# Supplementary material for: Municipal Territoriality: The Impact of Centralized Mechanisms and Political and Structural Factors on Reducing Spatial Inequality
Source: MDPI journal article supplement (doi:10.3390/urbansci8020025), 2024-03-25
Supplement: s1 [file s1]

**Table S1.** Means, SD and Correlations between the Research Variables for BC2003-2016—H1.

|                     |                                                              | Mean  | SD    | 1        | 2        | 3        | 4       | 5       |
|---------------------|--------------------------------------------------------------|-------|-------|----------|----------|----------|---------|---------|
| Dependent variables | 1. Timing of the boundary commission's decision              | 9.04  | 3.20  |          |          |          |         |         |
|                     | 2. Socioeconomic status                                      | 4.50  | 2.07  | 0.03     |          |          |         |         |
|                     | 3. Geographic closeness to the center                        | 5.52  | 1.87  | 0.01     | 0.33 *** |          |         |         |
|                     | 4. Ethnicity (Jewish)                                        | 0.71  | 0.45  | -0.07    | 0.62 *** | 0.31 *** |         |         |
|                     | 5. Political affiliation (Right, ultra-Orthodox)             | 0.68  | 0.47  | 0.07     | 0.02     | 0.31 *** | 0.57 ** |         |
|                     | 6. Relative growth in land area of recipient local authority | 13.18 | 47.83 | -0.35 ** | 0.06     | -0.18    | -0.06   | -0.25 * |

N = 94; \*  $p < 0.05$ , \*\*  $p < 0.01$ , \*\*\*  $p < 0.001$ .

**Table S2.** Analyses testing indirect effects of built-in structural and political factors moderating the correlation between the timing of the decision and relative growth in land transferred (PROCESS Model #1)—BC2003-2016—H2.

| Dependent Variable = Relative amount of Land Transferred to Recipient Local Authority |                                                         |          |                                                        |           |                                                         |           |
|---------------------------------------------------------------------------------------|---------------------------------------------------------|----------|--------------------------------------------------------|-----------|---------------------------------------------------------|-----------|
|                                                                                       | R <sup>2</sup> = 0.19 ***<br>ΔR <sup>2</sup> = 0.09 *** |          | R <sup>2</sup> = 0.19 ***<br>ΔR <sup>2</sup> = 0.09 ** |           | R <sup>2</sup> = 0.31 ***<br>ΔR <sup>2</sup> = 0.16 *** |           |
|                                                                                       | Model I                                                 |          | Model II                                               |           | Model III                                               |           |
| Predictors                                                                            | B (SE)                                                  | T        | B (SE)                                                 | T         | B (SE)                                                  | T         |
| Fixed                                                                                 | -43.45<br>(34.53)                                       | -1.25    | 198.25 (29.88)                                         | 4.48 ***  | 154.99 (26.95)                                          | 5.75 ***  |
| Timing of Decision                                                                    | 4.50 (3.10)                                             | 1.45     | -15.75 (4.13)                                          | -3.81 *** | -12.48 (2.55)                                           | -4.89 *** |
| Socioeconomic Status                                                                  | 22.52 (6.87)                                            | 3.27 **  |                                                        |           |                                                         |           |
| Geographic closeness to the center                                                    |                                                         |          | -26.60 (7.59)                                          | -3.50 **  |                                                         |           |
| Political Affiliation (Right, ultra-Orthodox)                                         |                                                         |          |                                                        |           | -153.13<br>(35.07)                                      | -4.36 *** |
| SES × Timing                                                                          | -1.93 (0.61)                                            | -3.15 ** |                                                        |           |                                                         |           |
| Geographic closeness to the center × Timing                                           |                                                         |          | 2.17 (0.70)                                            | 3.09 **   |                                                         |           |
| Political Affiliation (Right, ultra-Orthodox) × Timing                                |                                                         |          |                                                        |           | 12.72 (3.26)                                            | 3.89 ***  |

N = 94;  $p < 0.05$  \*,  $p < 0.01$  \*\*,  $p < 0.001$  \*\*\*; R<sup>2</sup> = Model Prediction; ΔR<sup>2</sup> = Prediction of moderation.

**Table S3.** Analyses testing simultaneous indirect effects of built-in structural and political factors moderating the correlation between the timing of the decision and relative growth in land transferred (PROCESS Model #2)—BC2003-2016—H2.

| Dependent Variable = Relative amount of Land Transferred to Recipient Local Authority                                                                                                      |               |  |               |  |               |  |               |  |               |  |               |  |
|--------------------------------------------------------------------------------------------------------------------------------------------------------------------------------------------|---------------|--|---------------|--|---------------|--|---------------|--|---------------|--|---------------|--|
| R <sup>2</sup> = 0.44 ***      R <sup>2</sup> = 0.33 ***      R <sup>2</sup> = 0.43 ***      R <sup>2</sup> = 0.29 ***      R <sup>2</sup> = 0.49 ***      R <sup>2</sup> = 0.42 ***       |               |  |               |  |               |  |               |  |               |  |               |  |
| ΔR <sup>2</sup> = 0.26 ***      ΔR <sup>2</sup> = 0.17 ***      ΔR <sup>2</sup> = 0.230 ***      ΔR <sup>2</sup> = 0.09 **      ΔR <sup>2</sup> = 0.24 ***      ΔR <sup>2</sup> = 0.18 *** |               |  |               |  |               |  |               |  |               |  |               |  |
| Model IV                      Model V                      Model VI                      Model VII                      Model VIII                      Model IX                           |               |  |               |  |               |  |               |  |               |  |               |  |
| Predictors                                                                                                                                                                                 | B (SE)      T |  |

|                                     |                   |              |                     |              |                    |              |                   |              |                    |              |                    |               |
|-------------------------------------|-------------------|--------------|---------------------|--------------|--------------------|--------------|-------------------|--------------|--------------------|--------------|--------------------|---------------|
| Fixed                               | 137.35<br>(37.58) | 3.65 **      | -18.38<br>(29.88)   | -0.61        | 107.81<br>(47.65)  | 2.26 *       | 194.94<br>(37.88) | 5.14 ***     | 275.68<br>(42.63)  | 6.46<br>***  | 157.52<br>(38.62)  | 4.078<br>***  |
| Timing of Decision                  | -12.81<br>(4.05)  | -3.15 *      | 3.50<br>(3.23)      | 1.08         | -9.17<br>(5.03)    | -1.82        | -18.89<br>(4.20)  | -4.49<br>*** | -26.25<br>(4.74)   | -5.53<br>*** | -14.23<br>(3.95)   | -3.610<br>*** |
| Socioeconomic Status                | 25.92 (5.26)      | 4.92 ***     | 39.4 (8.3)          | 4.73<br>***  | 10.08<br>(7.14)    | 1.41         |                   |              |                    |              |                    |               |
| Geographic closeness to the center  | -35.80<br>(6.13)  | -4.73<br>*** |                     |              |                    |              | -31.31<br>(7.38)  | -4.23<br>*** | -22.94<br>(7.59)   | -3.02<br>**  |                    |               |
| Ethnicity (Jewish)                  |                   |              | -158.94<br>(40.569) | -3.70<br>*** |                    |              | 59.20<br>(33.12)  | 1.78 *       |                    |              | 17.82<br>(49.02)   | -1.037        |
| Political Affiliation †             |                   |              |                     |              | -153.51<br>(34.39) | -4.46<br>*** |                   |              | -119.79<br>(33.84) | -3.02<br>*** | -169.30<br>(38.81) | -3.617<br>*** |
| SES × Timing                        | -2.70 (0.57)      | -5.83<br>*** | -3.86<br>(0.09)     | -4.26<br>*** | -1.22<br>(0.77)    | -1.56        |                   |              |                    |              |                    |               |
| G. closeness to the center × Timing | 3.67 (0.69)       | 5.31 ***     |                     |              |                    |              | 3.25<br>(0.82)    | 3.97 **      | 2.20<br>(0.86)     | 2.54 *       |                    |               |
| Ethnicity (Jewish) × Timing         |                   |              | 14.77<br>(4.50)     | 3.27<br>***  |                    |              | -6.98<br>(3.41)   | -2.04 *      |                    |              | -3.82<br>(5.23)    | 0.586         |
| Political Affiliation † × Timing    |                   |              |                     |              | 15.45<br>(3.75)    | 4.12<br>***  |                   |              | 11.66<br>(3.75)    | 3.10 **      | 17.87<br>(4.28)    | 3.336<br>***  |

N = 175;  $p < 0.05$  \*,  $p < 0.01$  \*\*,  $p < 0.001$  \*\*\*;  $R^2$  = Model Prediction;  $\Delta R^2$  = Prediction of simultaneous moderation; † = Right, ultra-Orthodox.

**Table S4.** Means, SD and Correlations between the Research Variables—PGC2016-2022—H3.

|                     |                                               | Mean             | SD                | 1        | 2        | 3        | 4        | 5        | 6     | 7       | 8       | 9     | 10   |
|---------------------|-----------------------------------------------|------------------|-------------------|----------|----------|----------|----------|----------|-------|---------|---------|-------|------|
| Dependent variables | 1. Socioeconomic status                       | 4.91             | 2.34              |          |          |          |          |          |       |         |         |       |      |
|                     | 2. Geographic closeness to the center         | 4.43             | 1.78              | 0.34 **  |          |          |          |          |       |         |         |       |      |
|                     | 3. Ethnicity (percentage of Jews)             | 61.8             | 46.7              | 0.72 **  | 0.25 **  |          |          |          |       |         |         |       |      |
|                     | 4. Political affiliation... †                 | 0.64             | 0.48              | -0.45 ** | 0.02     | 0.24 *   |          |          |       |         |         |       |      |
|                     | 5. Financial soundness                        | 47               | 19.2              | 0.81 **  | 0.41 **  | 0.71 **  | -0.34 ** |          |       |         |         |       |      |
|                     | 6. Size of population                         | K27              | K63               | 0.00     | 0.31 **  | 0.10     | 0.06     | 0.13 *   |       |         |         |       |      |
|                     | 7. Area of local authority in KM <sup>2</sup> | K89 <sup>2</sup> | K302 <sup>2</sup> | 0.16 *   | -0.20 ** | 0.18 **  | -0.29 ** | 0.37 **  | -0.01 |         |         |       |      |
|                     | 8. The area demanded by the LA... ††          | 0.37             | 1.06              | 0.02     | -0.04    | 0.07     | -0.05    | -0.11    | -0.04 | 0.14    |         |       |      |
|                     | 9. Initiator (the recipient local authority)  | 0.61             | 0.49              | -0.14 *  | -0.15 *  | -0.21 ** | -0.09    | -0.17 ** | -0.02 | -0.12   | 0.08    |       |      |
|                     | 10. Relative growth in land area              | 0.32             | 1.16              | 0.20 *   | -0.02    | 0.19 *   | -0.10    | 0.06     | -0.02 | 0.23 ** | 0.84 ** | -0.03 |      |
|                     | 11. Rates of increase in tax revenues         | 0.30             | 0.96              | -0.17    | 0.11     | -0.25 *  | 0.19     | -0.28 ** | -0.13 | -0.16   | 0.02    | -0.16 | 0.15 |

N = 280; \*  $p < 0.05$ , \*\*  $p < 0.01$ , \*\*\*  $p < 0.001$ ; † ...of the mayor is as of the political affiliation of the Interior Minister or the government coalition; †† ...relative to its size.

**Table S5.** Analyses testing indirect effects of built-in structural and political factors moderating the correlation between area demanded and relative growth in land transferred and rates of increase in tax revenues (PROCESS Model #1)—PGC2016-2022—H4.

| Predictors                                | Dependent Variable = Relative Amount of Land Transferred to Recipient Local Authority |          |                            |          |                            |         | Dependent Variable = Rates of Increase in Tax Revenues |           |                            |           |
|-------------------------------------------|---------------------------------------------------------------------------------------|----------|----------------------------|----------|----------------------------|---------|--------------------------------------------------------|-----------|----------------------------|-----------|
|                                           | R <sup>2</sup> = 0.82 ***                                                             |          | R <sup>2</sup> = 0.33 ***  |          | R <sup>2</sup> = 0.73 ***  |         | R <sup>2</sup> = 0.73 ***                              |           | R <sup>2</sup> = 0.42 ***  |           |
|                                           | ΔR <sup>2</sup> = 0.09 ***                                                            |          | ΔR <sup>2</sup> = 0.06 *** |          | ΔR <sup>2</sup> = 0.02 *** |         | ΔR <sup>2</sup> = 0.02 **                              |           | ΔR <sup>2</sup> = 0.39 *** |           |
|                                           | Model X                                                                               |          | Model XI                   |          | Model XII                  |         | Model XIII                                             |           | Model XIV                  |           |
|                                           | B(SE)                                                                                 | T        | B (SE)                     | T        | B (SE)                     | T       | B (SE)                                                 | T         | B (SE)                     | T         |
| Fixed                                     | 0.20 (0.13)                                                                           | 1.53     | 0.11 (0.09)                | 1.14     | -0.05 (0.16)               | -0.31   | -0.05 (0.07)                                           | -0.69     | -0.12 (0.39)               | -0.29 *** |
| Area demanded                             | -0.32 (0.16)                                                                          | -2.05 *  | 0.13 (0.14)                | 0.96     | 0.41 (0.18)                | 2.21 *  | 0.73 (0.07)                                            | 10.22 *** | 9.67 (2.24)                | 4.32 ***  |
| Socioeconomic Status                      | -0.03 (0.02)                                                                          | -1.34    |                            |          |                            |         |                                                        |           |                            |           |
| Ethnicity (Jewish)                        |                                                                                       |          | 0.00 (0.00)                | -1.13    |                            |         |                                                        |           |                            |           |
| Financial soundness                       |                                                                                       |          |                            |          | 0.00 (0.00)                | 0.03    |                                                        |           |                            |           |
| Area of local authority                   |                                                                                       |          |                            |          |                            |         | 0.00 (0.00)                                            | 0.91      |                            |           |
| Initiator (the recipient local authority) |                                                                                       |          |                            |          |                            |         |                                                        |           | 0.42 (0.47)                | 0.89      |
| Area demanded ×Socioeconomic Status       | 0.19 (0.02)                                                                           | 7.94 *** |                            |          |                            |         |                                                        |           |                            |           |
| Area demanded ×Ethnicity (Jewish)         |                                                                                       |          | 0.01 (0.00)                | 5.72 *** |                            |         |                                                        |           |                            |           |
| Area demanded ×Financial soundness        |                                                                                       |          |                            |          | 0.01 (0.00)                | 2.78 ** |                                                        |           |                            |           |
| Area demanded ×Area of local authority    |                                                                                       |          |                            |          |                            |         | 0.00 (0.00)                                            | 2.81 **   |                            |           |
| Area demanded ×Initiator                  |                                                                                       |          |                            |          |                            |         |                                                        |           | -9.66 (2.25)               | -4.30 *** |

N = 280;  $p < 0.05$  \*,  $p < 0.01$  \*\*,  $p < 0.001$  \*\*\*; R<sup>2</sup> = Model Prediction; ΔR<sup>2</sup> = Prediction of moderation.

| Table S6: Analyses testing simultaneous indirect effects of built-in structural and political factors moderating the correlation between area demanded and relative growth in land transferred (PROCESS Model #2)–PGC2016-2022 – H4 |           |           |           |            |           |             |           |           |           |          |             |           |           |         |
|-------------------------------------------------------------------------------------------------------------------------------------------------------------------------------------------------------------------------------------|-----------|-----------|-----------|------------|-----------|-------------|-----------|-----------|-----------|----------|-------------|-----------|-----------|---------|
| Dependent Variable = Relative amount of land transferred to recipient local authority                                                                                                                                               |           |           |           |            |           |             |           |           |           |          |             |           |           |         |
| R <sup>2</sup> =.83***<br>ΔR <sup>2</sup> =.10***                                                                                                                                                                                   |           |           |           |            |           |             |           |           |           |          |             |           |           |         |
| R <sup>2</sup> =.83***<br>ΔR <sup>2</sup> =.10***                                                                                                                                                                                   |           |           |           |            |           |             |           |           |           |          |             |           |           |         |
| R <sup>2</sup> =.97***<br>ΔR <sup>2</sup> =.06***                                                                                                                                                                                   |           |           |           |            |           |             |           |           |           |          |             |           |           |         |
| R <sup>2</sup> =.83***<br>ΔR <sup>2</sup> =.10**                                                                                                                                                                                    |           |           |           |            |           |             |           |           |           |          |             |           |           |         |
| R <sup>2</sup> =.82***<br>ΔR <sup>2</sup> =.10***                                                                                                                                                                                   |           |           |           |            |           |             |           |           |           |          |             |           |           |         |
| R <sup>2</sup> =.82***<br>ΔR <sup>2</sup> =.09***                                                                                                                                                                                   |           |           |           |            |           |             |           |           |           |          |             |           |           |         |
| R <sup>2</sup> =.83***<br>ΔR <sup>2</sup> =.10***                                                                                                                                                                                   |           |           |           |            |           |             |           |           |           |          |             |           |           |         |
| Model XV                                                                                                                                                                                                                            |           | Model XVI |           | Model XVII |           | Model XVIII |           | Model XIX |           | Model XX |             | Model XXI |           |         |
| Predictors                                                                                                                                                                                                                          | B(SE)     | T         | B(SE)     | T          | B(SE)     | T           | B(SE)     | T         | B(SE)     | T        | B(SE)       | T         | B(SE)     | T       |
| Fixed                                                                                                                                                                                                                               | .23(.15)  | 1.51      | .27(.14)  | 1.98*      | .12(.35)  | .35         | .21(.14)  | 1.54      | .22(.13)  | 1.65     | .20(.13)    | 1.54      | .43(.16)  | 2.73**  |
| Area demanded                                                                                                                                                                                                                       | -.13(.16) | -.80      | -.44(.16) | -2.73**    | -.64(.21) | -3.01***    | -.18(.17) | -1.09     | -.34(.16) | -2.14*   | -.31(.16)   | -1.98*    | -.27(.16) | -1.70   |
| Socioeconomic Status                                                                                                                                                                                                                | -.03(.02) | -1.21     | -.05(.04) | -1.39      | -.03(.05) | -.56        | -.03(.04) | -.82      | -.03(.02) | -1.52    | -.03(.1602) | -1.45     | -.05(.02) | -2.08*  |
| Closeness to the center                                                                                                                                                                                                             | -.01(.03) | -.20      |           |            |           |             |           |           |           |          |             |           |           |         |
| Ethnicity (Jewish)                                                                                                                                                                                                                  |           |           | .00(.00)  | .59        |           |             |           |           |           |          |             |           |           |         |
| Political Affiliation†                                                                                                                                                                                                              |           |           |           |            | .09(.15)  | .62         |           |           |           |          |             |           |           |         |
| Financial soundness                                                                                                                                                                                                                 |           |           |           |            |           |             | .00(.00)  | -.05      |           |          |             |           |           |         |
| Size of population                                                                                                                                                                                                                  |           |           |           |            |           |             |           |           | .00(.00)  | -.12     |             |           |           |         |
| Area of local authority                                                                                                                                                                                                             |           |           |           |            |           |             |           |           |           |          | .00(.00)    | .91       |           |         |
| Initiator (the recipient LA)                                                                                                                                                                                                        |           |           |           |            |           |             |           |           |           |          |             |           | -.24(.10) | -2.28*  |
| SES X Area demanded                                                                                                                                                                                                                 | .21(.02)  | 8.53***   | .17(.03)  | 5.29***    | .23(.03)  | 7.84***     | .24(.03)  | 7.65***   | .21(.03)  | 8.06***  | .19(.03)    | 7.14***   | .20(.02)  | 8.34*** |
| Closeness to the center X Area demanded                                                                                                                                                                                             | -.06(.02) | -2.89***  |           |            |           |             |           |           |           |          |             |           |           |         |
| Ethnicity (Jewish) X Area demanded                                                                                                                                                                                                  |           |           | .00(.00)  | 1.64       |           |             |           |           |           |          |             |           |           |         |
| Political Affiliation† X Area demanded                                                                                                                                                                                              |           |           |           |            | .20(.07)  | 2.87**      |           |           |           |          |             |           |           |         |
| Financial soundness X Area demanded                                                                                                                                                                                                 |           |           |           |            |           |             | -.01(.00) | -2.44*    |           |          |             |           |           |         |
| Size of population X Area demanded                                                                                                                                                                                                  |           |           |           |            |           |             |           |           | .00(.00)  | -1.83*   |             |           |           |         |
| Area of local authority X Area demanded                                                                                                                                                                                             |           |           |           |            |           |             |           |           |           |          | -.00(.00)   | -.38      |           |         |
| Initiator (the recipient LA) X Area demanded                                                                                                                                                                                        |           |           |           |            |           |             |           |           |           |          |             |           | -.10(.08) | -1.14   |
| N=175; <i>p</i> < .05*, <i>p</i> < .01**, <i>p</i> < .001*** ; R <sup>2</sup> =Model Prediction; ΔR <sup>2</sup> =Prediction of simultaneous moderation                                                                             |           |           |           |            |           |             |           |           |           |          |             |           |           |         |
| † =Right, ultra-Orthodox;                                                                                                                                                                                                           |           |           |           |            |           |             |           |           |           |          |             |           |           |         |

N=175;  $p < .05^*$ ,  $p < .01^{**}$ ,  $p < .001^{***}$ ; R<sup>2</sup>=Model Prediction; ΔR<sup>2</sup>=Prediction of simultaneous moderation

† =Right, ultra-Orthodox;

| Table S6 – Continued-1: Analyses testing simultaneous indirect effects of built-in structural and political factors moderating the correlation between area demanded and relative growth in land transferred (PROCESS Model #2)– PGC2016-2022 – H4 |                                                   |       |                                                 |         |                                                   |      |                                                  |         |                                                   |         |                                                   |      |                                                   |       |
|----------------------------------------------------------------------------------------------------------------------------------------------------------------------------------------------------------------------------------------------------|---------------------------------------------------|-------|-------------------------------------------------|---------|---------------------------------------------------|------|--------------------------------------------------|---------|---------------------------------------------------|---------|---------------------------------------------------|------|---------------------------------------------------|-------|
| Dependent Variable = Relative amount of land transferred to recipient local authority                                                                                                                                                              |                                                   |       |                                                 |         |                                                   |      |                                                  |         |                                                   |         |                                                   |      |                                                   |       |
|                                                                                                                                                                                                                                                    | R <sup>2</sup> =.80***<br>ΔR <sup>2</sup> =.07*** |       | R <sup>2</sup> =.91***<br>ΔR <sup>2</sup> =.02* |         | R <sup>2</sup> =.79***<br>ΔR <sup>2</sup> =.07*** |      | R <sup>2</sup> =.74***<br>ΔR <sup>2</sup> =.02** |         | R <sup>2</sup> =.74***<br>ΔR <sup>2</sup> =.02*** |         | R <sup>2</sup> =.78***<br>ΔR <sup>2</sup> =.06*** |      | R <sup>2</sup> =.78***<br>ΔR <sup>2</sup> =.06*** |       |
|                                                                                                                                                                                                                                                    | Model XXII                                        |       | Model XXIII                                     |         | Model XXIV                                        |      | Model XXV                                        |         | Model XXVI                                        |         | Model XXVII                                       |      | Model XXVIII                                      |       |
| Predictors                                                                                                                                                                                                                                         | B(SE)                                             | T     | B(SE)                                           | T       | B(SE)                                             | T    | B(SE)                                            | T       | B(SE)                                             | T       | B(SE)                                             | T    | B(SE)                                             | T     |
| Fixed                                                                                                                                                                                                                                              | .23(.15)                                          | 1.54  | .08(.30)                                        | .26     | .11(.17)                                          | .64  | -.01(.17)                                        | -.07    | -.04(.17)                                         | -.23    | .14(.16)                                          | .82  | .11(.09)                                          | 1.13  |
| Area demanded                                                                                                                                                                                                                                      | .31(.15)                                          | 2.02* | 1.57(.20)                                       | 7.82*** | .28(.17)                                          | 1.69 | 1.04(.13)                                        | 8.15*** | .87(.14)                                          | 6.40*** | .03(.18)                                          | .17  | .14(.14)                                          | .97   |
| Closeness to the center                                                                                                                                                                                                                            | -.03(.03)                                         | -.92  | -.01(.05)                                       | -.22    | -.01(.04)                                         | -.19 | -.01(.04)                                        | -.14    | .00(.03)                                          | -.02    |                                                   |      |                                                   |       |
| Ethnicity (Jewish)                                                                                                                                                                                                                                 | .00(.00)                                          | -.75  |                                                 |         |                                                   |      |                                                  |         |                                                   |         | .00(.00)                                          | -.59 | .00(.00)                                          | -1.11 |
| Political Affiliation†                                                                                                                                                                                                                             |                                                   |       | -.06(.21)                                       | -.28    |                                                   |      |                                                  |         |                                                   |         |                                                   |      |                                                   |       |

|                                              |           |         |           |          |           |          |           |         |           |          |          |         |          |         |
|----------------------------------------------|-----------|---------|-----------|----------|-----------|----------|-----------|---------|-----------|----------|----------|---------|----------|---------|
| Financial soundness                          |           |         |           |          | .00(.00)  | -.53     |           |         |           |          | .00(.00) | -.18*   |          |         |
| Size of population                           |           |         |           |          |           |          | .00(.00)  | .18     |           |          |          |         | .00(.00) | -.06    |
| Area of local authority                      |           |         |           |          |           |          |           |         | .00(.00)  | .85      |          |         |          |         |
| Initiator (the recipient LA)                 |           |         |           |          |           |          |           |         |           |          |          |         |          |         |
| Closeness to the center X Area demanded      | -.06(.02) | -2.57** | -.10(.03) | -3.01*** | -.16(.03) | -4.99*** | -.09(.03) | -2.75** | -.03(.03) | -1.18*** |          |         |          |         |
| Ethnicity (Jewish) X Area demanded           | .01(.00)  | 6.45*** |           |          |           |          |           |         |           |          | .01(.00) | 4.67*** | .01(.00) | 5.51*** |
| Political Affiliation† X Area demanded       |           |         | -.25(.13) | -1.91*   |           |          |           |         |           |          |          |         |          |         |
| Financial soundness X Area demanded          |           |         |           |          | .03(.01)  | 5.95***  |           |         |           |          | .00(.00) | .84     |          |         |
| Size of population X Area demanded           |           |         |           |          |           |          | .00(.00)  | 3.09*** |           |          |          |         | .00(.00) | -.18    |
| Area of local authority X Area demanded      |           |         |           |          |           |          |           |         | .00(.00)  | 2.84**   |          |         |          |         |
| Initiator (the recipient LA) X Area demanded |           |         |           |          |           |          |           |         |           |          |          |         |          |         |

N=175;  $p < .05^*$ ,  $p < .01^{**}$ ,  $p < .001^{***}$ ;  $R^2$ =Model Prediction;  $\Delta R^2$ =Prediction of simultaneous moderation

† =Right, ultra-Orthodox;

**Table S6.** Continued-2: Analyses testing simultaneous indirect effects of built-in structural and political factors moderating the correlation between area demanded and relative growth in land transferred (PROCESS Model #2)—PGC2016-2022—H4.

| Predictors              | Dependent Variable = Relative Amount of Land Transferred to Recipient Local Authority |       |                           |        |                           |       |                          |         |                           |       |                          |          |                           |          |
|-------------------------|---------------------------------------------------------------------------------------|-------|---------------------------|--------|---------------------------|-------|--------------------------|---------|---------------------------|-------|--------------------------|----------|---------------------------|----------|
|                         | $R^2 = 0.79^{***}$                                                                    |       | $R^2 = 0.78^{***}$        |        | $R^2 = 0.75^{***}$        |       | $R^2 = 0.74^{***}$       |         | $R^2 = 0.76^{***}$        |       | $R^2 = 0.74^{***}$       |          | $R^2 = 0.75^{***}$        |          |
|                         | $\Delta R^2 = 0.06^{***}$                                                             |       | $\Delta R^2 = 0.06^{***}$ |        | $\Delta R^2 = 0.03^{***}$ |       | $\Delta R^2 = 0.02^{**}$ |         | $\Delta R^2 = 0.04^{***}$ |       | $\Delta R^2 = 0.02^{**}$ |          | $\Delta R^2 = 0.03^{***}$ |          |
|                         | Model XXIX                                                                            |       | Model XXX                 |        | Model XXXI                |       | Model XXXII              |         | Model XXXIII              |       | Model XXXIV              |          | Model XXXV                |          |
|                         | B (SE)                                                                                | T     | B (SE)                    | T      | B (SE)                    | T     | B (SE)                   | T       | B (SE)                    | T     | B (SE)                   | T        | B (SE)                    | T        |
| Fixed                   | 0.11<br>(0.09)                                                                        | 1.20  | 0.28<br>(0.13)            | 2.18 * | 0.05<br>(0.16)            | 0.28  | -0.02<br>(0.16)          | -0.13   | 0.29<br>(0.20)            | 1.49  | -0.05<br>(0.07)          | -0.66    | 0.09<br>(0.10)            | 0.91     |
| Area demanded           | 0.10<br>(0.14)                                                                        | 0.76  | 0.11<br>(0.17)            | 0.66   | -0.08<br>(0.26)           | -0.33 | 0.48<br>(0.19)           | 2.48 ** | 0.29<br>(0.18)            | 1.63  | 0.78<br>(0.08)           | 9.34 *** | 0.85<br>(0.09)            | 9.79 *** |
| Ethnicity (Jewish)      | 0.00<br>(0.00)                                                                        | -1.15 | 0.00<br>(0.00)            | -1.69  |                           |       |                          |         |                           |       |                          |          |                           |          |
| Political Affiliation † |                                                                                       |       |                           |        |                           |       |                          |         |                           |       |                          |          |                           |          |
| Financial soundness     |                                                                                       |       |                           |        | 0.00<br>(0.00)            | -0.76 | 0.00<br>(0.00)           | -0.17   | 0.00<br>(0.00)            | -1.19 |                          |          |                           |          |
| Size of population      |                                                                                       |       |                           |        | 0.00<br>(0.00)            | 0.39  |                          |         |                           |       | 0.00<br>(0.00)           | 0.20     |                           |          |
| Area of local authority | 0.00<br>(0.00)                                                                        | 0.78  |                           |        |                           |       | 0.00<br>(0.00)           | 0.92    |                           |       | 0.00<br>(0.00)           | 0.86     | 0.00<br>(0.00)            | 0.46     |

|                                             |                |             |                 |                |             |                |      |                 |             |                |         |                 |          |
|---------------------------------------------|----------------|-------------|-----------------|----------------|-------------|----------------|------|-----------------|-------------|----------------|---------|-----------------|----------|
| Initiator (the recipient LA)                |                |             | -0.23<br>(0.12) | -1.93<br>*     |             |                |      | -0.24<br>(0.12) | -1.89<br>*  |                |         | -0.18<br>(0.12) | -1.48    |
| Ethnicity (Jewish)                          | 0.01<br>(0.00) | 5.13<br>*** | 0.01<br>(0.00)  | 5.60<br>***    |             |                |      |                 |             |                |         |                 |          |
| ×Area demanded                              |                |             |                 |                |             |                |      |                 |             |                |         |                 |          |
| Political Affiliation †                     |                |             |                 |                |             |                |      |                 |             |                |         |                 |          |
| ×Area demanded                              |                |             |                 |                |             |                |      |                 |             |                |         |                 |          |
| Financial soundness                         |                |             |                 | 0.03<br>(0.01) | 3.69<br>*** | 0.01<br>(0.00) | 1.48 | 0.02<br>(0.00)  | 4.20<br>*** |                |         |                 |          |
| ×Area demanded                              |                |             |                 |                |             |                |      |                 |             |                |         |                 |          |
| Size of population                          |                |             |                 | 0.00<br>(0.00) | -2.68<br>** |                |      |                 |             | 0.00<br>(0.00) | 1.07    |                 |          |
| ×Area demanded                              |                |             |                 |                |             |                |      |                 |             |                |         |                 |          |
| Area of local authority ×Area demanded      | 0.00<br>(0.00) | 1.75<br>*   |                 |                |             | 0.00<br>(0.00) | 1.43 |                 |             | 0.00<br>(0.00) | 2.75 ** | 0.00<br>(0.00)  | 3.43 *** |
| Initiator (the recipient LA) ×Area demanded |                |             | 0.06<br>(0.10)  | 0.58           |             |                |      | -0.30<br>(0.12) | -2.57<br>** |                |         | -0.21<br>(0.11) | -1.93 *  |

N = 175;  $p < 0.05$  \*,  $p < 0.01$  \*\*,  $p < 0.001$  \*\*\*;  $R^2$  = Model Prediction;  $\Delta R^2$  = Prediction of simultaneous moderation; † = Right, ultra-Orthodox.

**Table S7.** Analyses testing simultaneous indirect effects of built-in structural and political factors moderating the correlation between area demanded and rates of increase in tax revenues (PROCESS Model #2)—PGC2016-2022—H4.

| Predictors                                   | Dependent Variable = Rates of Increase in Tax Revenues |              |                         |              |                         |          |                          |              |                         |          |                         |           |
|----------------------------------------------|--------------------------------------------------------|--------------|-------------------------|--------------|-------------------------|----------|--------------------------|--------------|-------------------------|----------|-------------------------|-----------|
|                                              | R <sup>2</sup> = 0.56 ***                              |              | R <sup>2</sup> = 0.46 * |              | R <sup>2</sup> = 0.48 * |          | R <sup>2</sup> = 0.50 ** |              | R <sup>2</sup> = 0.45 * |          | R <sup>2</sup> = 0.44 * |           |
|                                              | $\Delta R^2 = 0.37$ ***                                |              | $\Delta R^2 = 0.42$ *** |              | $\Delta R^2 = 0.27$ **  |          | $\Delta R^2 = 0.31$ **   |              | $\Delta R^2 = 0.36$ **  |          | $\Delta R^2 = 0.37$ **  |           |
|                                              | Model XXXVI                                            |              | Model XXXVII            |              | Model XXXVIII           |          | Model XXXIX              |              | Model XXXX              |          | Model XXXXI             |           |
|                                              | B (SE)                                                 | T            | B (SE)                  | T            | B (SE)                  | T        | B (SE)                   | T            | B (SE)                  | T        | B (SE)                  | T         |
| Fixed                                        | 0.67<br>(1.06)                                         | 0.63         | 1.12<br>(1.06)          | 1.05         | 0.20<br>(0.81)          | 0.25     | 1.08<br>(1.17)           | 0.92         | -0.04<br>(0.63)         | -0.06    | -0.08<br>(0.51)         | -0.16     |
| Area demanded                                | 12.22<br>(3.27)                                        | 3.74<br>***  | 9.17<br>(3.20)          | 2.87 **      | 9.25<br>(2.86)          | 3.23 *** | 9.31<br>(3.30)           | 2.83 **      | 9.94<br>(2.77)          | 3.59 *** | 9.60<br>(2.66)          | 3.61 ***  |
| Socioeconomic Status                         | -0.12<br>(0.16)                                        | -0.76        |                         |              |                         |          |                          |              |                         |          |                         |           |
| Closeness to the center                      |                                                        |              | -0.27<br>(0.20)         | -1.30        |                         |          |                          |              |                         |          |                         |           |
| Ethnicity (Jewish)                           |                                                        |              |                         |              | -0.30<br>(0.68)         | -0.45    |                          |              |                         |          |                         |           |
| Financial soundness                          |                                                        |              |                         |              |                         |          | -0.02<br>(0.02)          | -1.08        |                         |          |                         |           |
| Size of population                           |                                                        |              |                         |              |                         |          |                          |              | 0.00<br>(0.00)          | -0.08    |                         |           |
| Area of local authority                      |                                                        |              |                         |              |                         |          |                          |              |                         |          | 0.00<br>(0.00)          | -0.26     |
| Initiator (the recipient LA)                 | 0.29<br>(0.54)                                         | 0.54         | 0.41<br>(0.61)          | 0.67         | 0.20<br>(0.63)          | 0.32     | 0.06<br>(0.10)           | 0.58         | 0.32<br>(0.63)          | 0.51     | 0.36<br>(0.63)          | 0.57      |
| Socioeconomic Status × Area demanded         | -0.65<br>(0.45)                                        | -1.43        |                         |              |                         |          |                          |              |                         |          |                         |           |
| Closeness to the center × Area demanded      |                                                        |              | 0.24<br>(0.46)          | 0.51         |                         |          |                          |              |                         |          |                         |           |
| Ethnicity (Jewish) × Area demanded           |                                                        |              |                         |              | -1.18<br>(1.13)         | -1.05    |                          |              |                         |          |                         |           |
| Financial soundness × Area demanded          |                                                        |              |                         |              |                         |          | -0.01<br>(0.05)          | -0.24        |                         |          |                         |           |
| Size of population × Area demanded           |                                                        |              |                         |              |                         |          |                          |              | 0.00<br>(0.00)          | -0.08    |                         |           |
| Area of local authority × Area demanded      |                                                        |              |                         |              |                         |          |                          |              |                         |          | 0.00<br>(0.00)          | -0.26     |
| Initiator (the recipient LA) × Area demanded | -9.02<br>(2.35)                                        | -3.83<br>*** | -9.97<br>(2.64)         | -3.78<br>*** | -8.09<br>(2.77)         | -2.92 ** | -8.82<br>(2.52)          | -3.50<br>*** | -8.67<br>(2.79)         | -3.11 ** | -8.80<br>(2.79)         | -3.16 *** |

N = 105;  $p < 0.05$  \*,  $p < 0.01$  \*\*,  $p < 0.001$  \*\*\*; R<sup>2</sup> = Model Prediction;  $\Delta R^2$  = Prediction of simultaneous moderation;

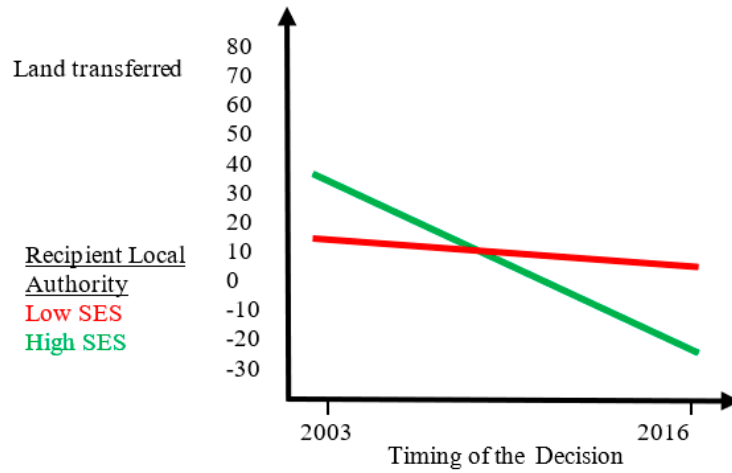

**Figure S1.** Socioeconomic status as a moderating factor (Model I).

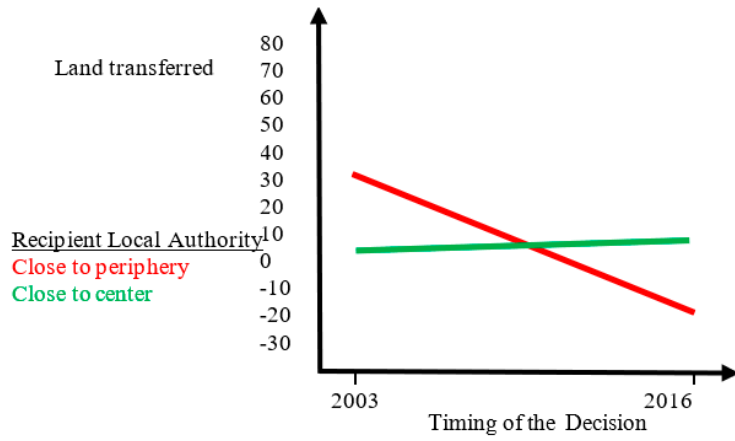

**Figure S2.** Geographic status of recipient local authority as a moderating factor (Model II).

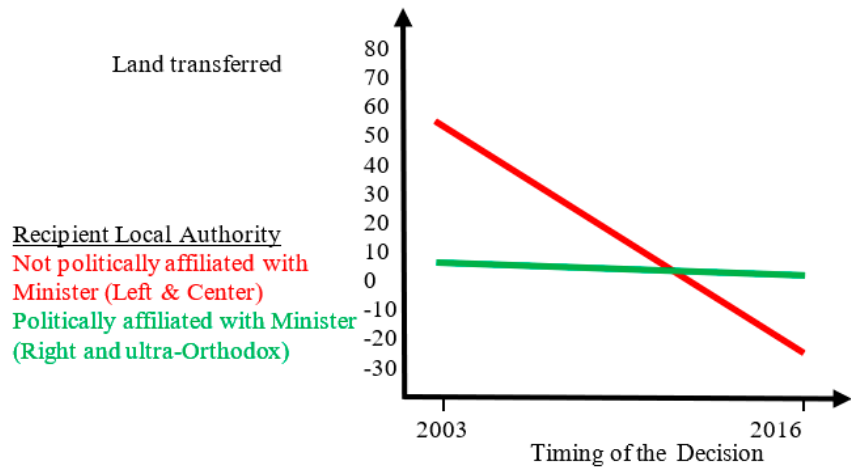

**Figure S3.** Political affiliation of head of recipient local authority as a moderating factor (Model III).



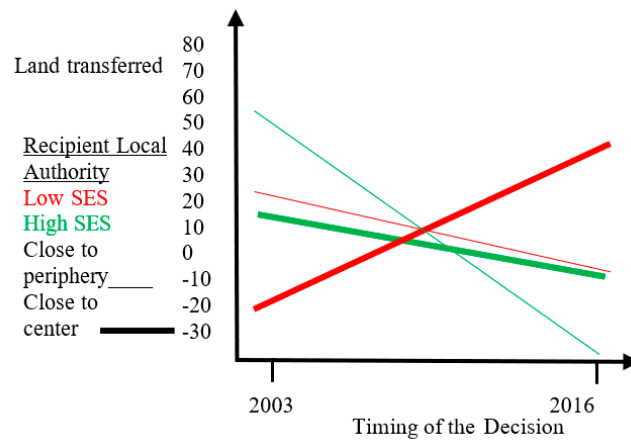

**Figure S4.** Simultaneous moderation of SES and geographic status (Model IV).

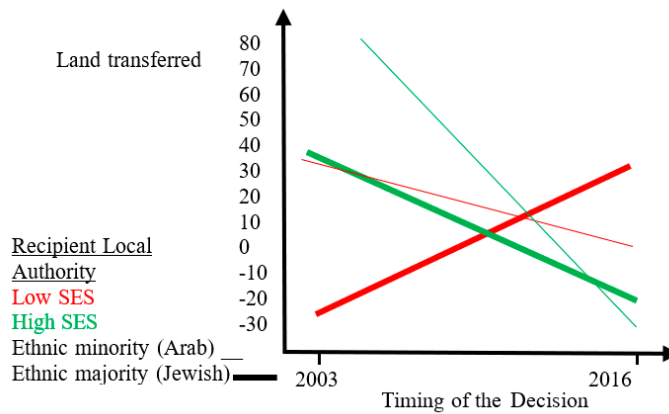

**Figure S5.** Simultaneous moderation of SES and ethnicity (Model V).

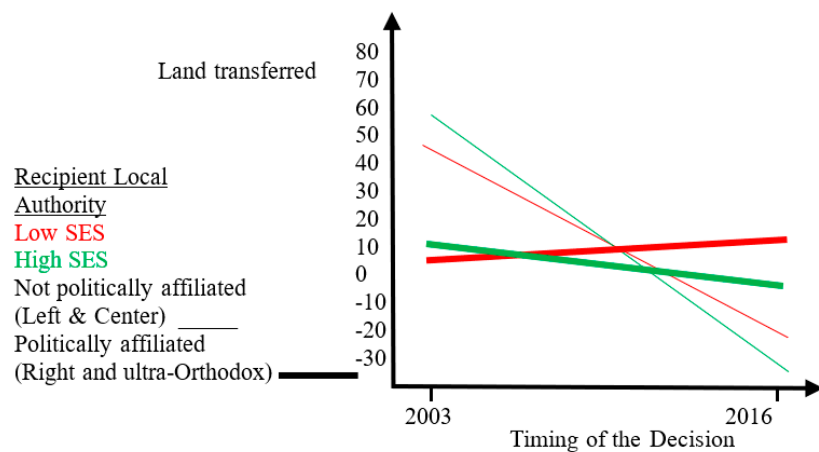

**Figure S6.** Simultaneous moderation of SES and political affiliation (Model VI).

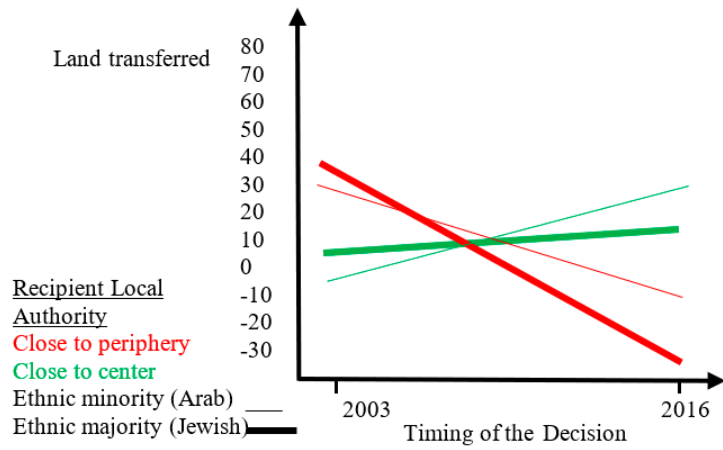

**Figure S7.** Simultaneous moderation of geographic status and ethnicity (Model VII).

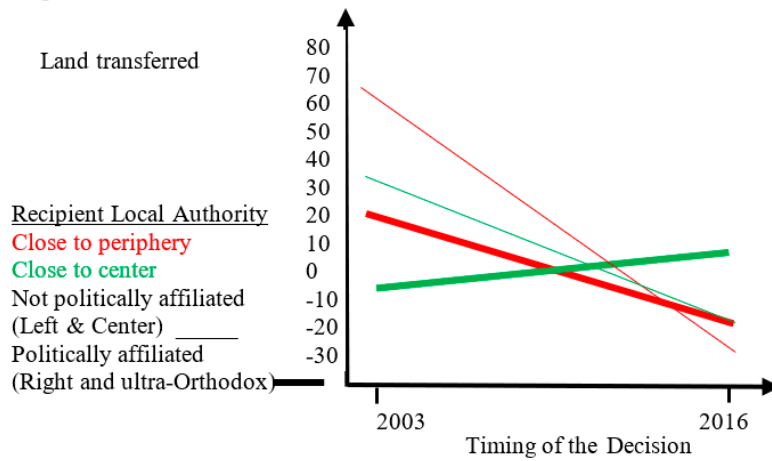

**Figure S8.** Simultaneous moderation of geographic status and political affiliation (Model XIII).

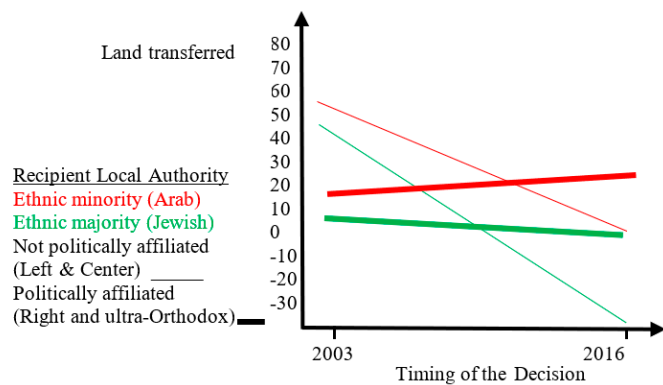

**Figure S9.** Simultaneous moderation of ethnicity and political affiliation (Model IX).

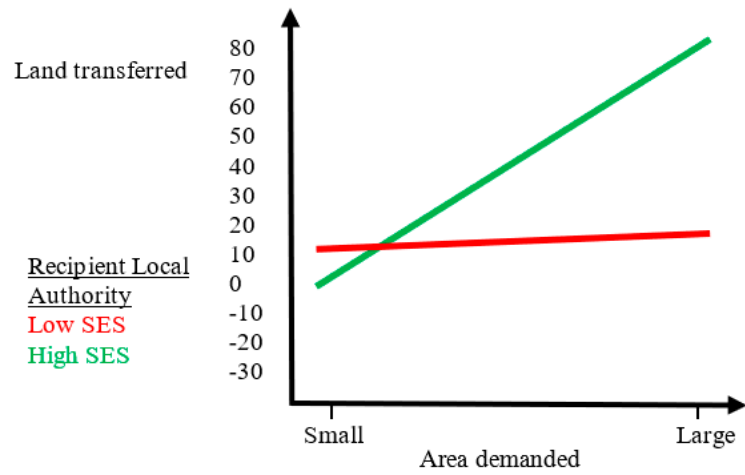

**Figure S10.** Socioeconomic status as a moderating factor (Model X).

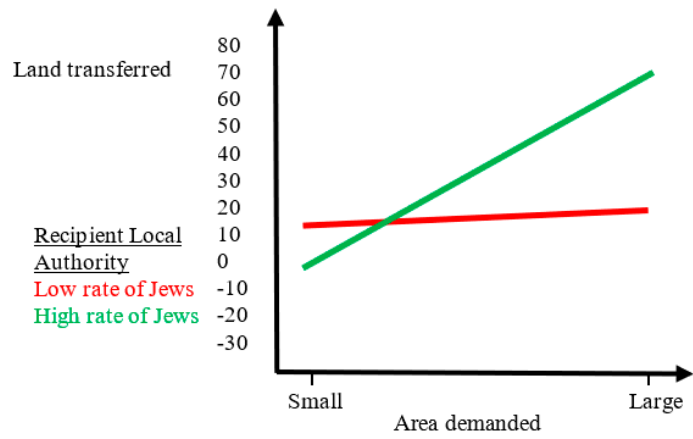

**Figure S11.** Rates of the national ethnic majority (Jews) as a moderating factor (Model XI).

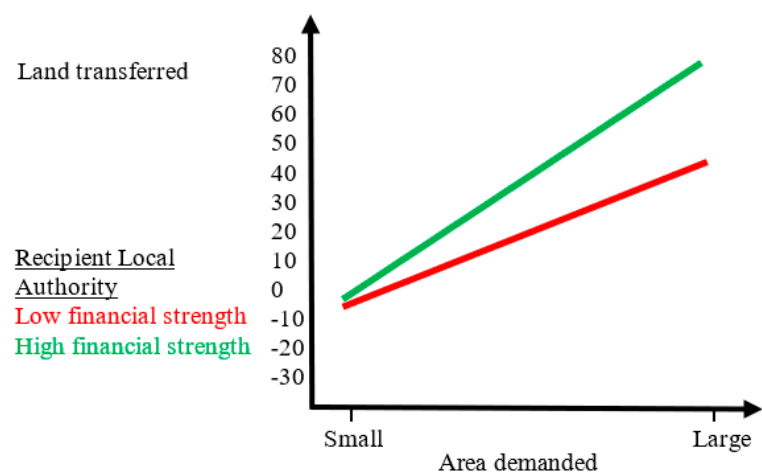

**Figure S12.** Financial strength as a moderating factor (Model XII).

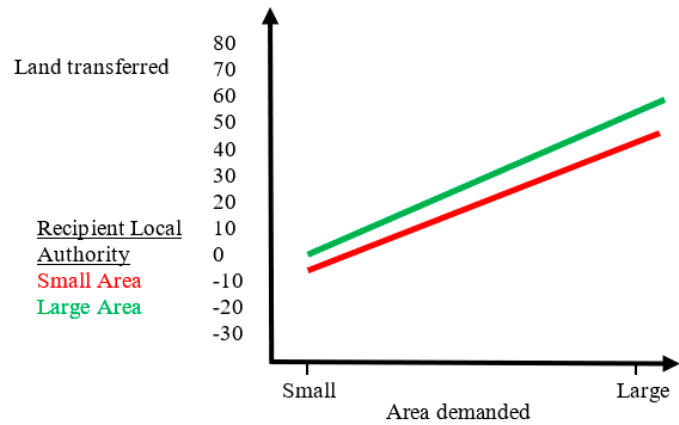

**Figure S13.** Area of local authority as a moderating factor (Model XIII).

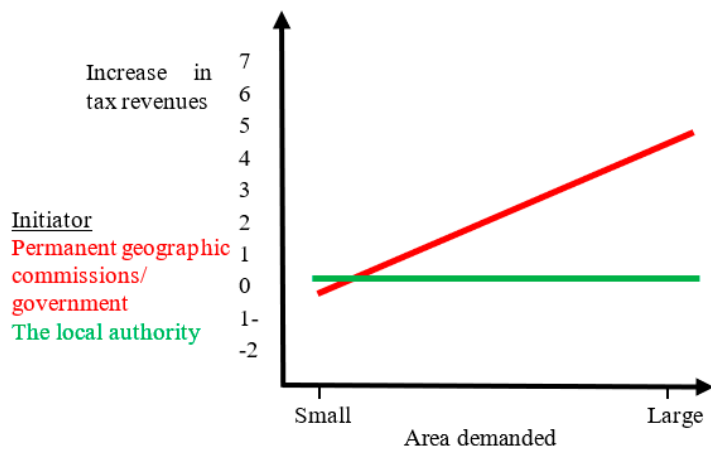

**Figure S14.** Initiator of land transfer process as a moderating factor (Model XIV).

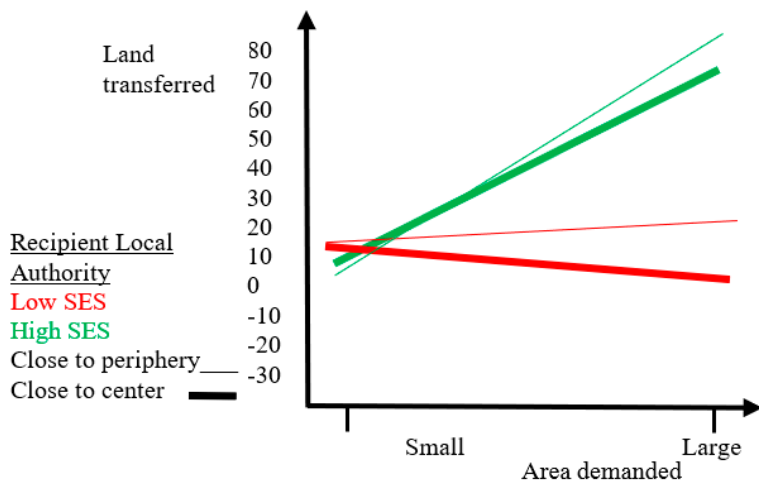

**Figure S15.** Simultaneous moderation of SES and geographic status (Model XV).

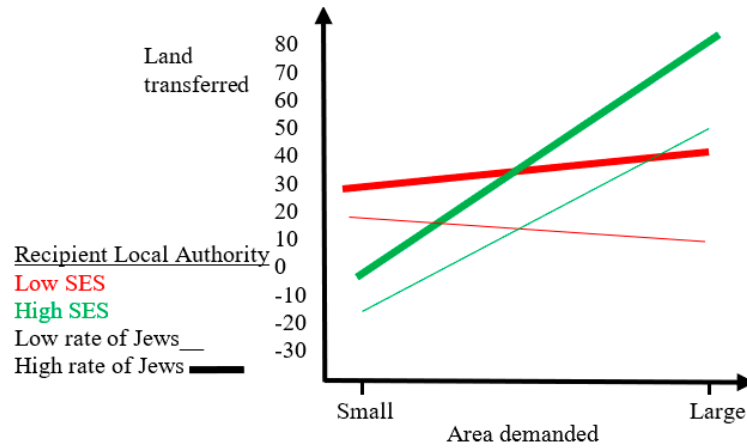

**Figure S16.** Simultaneous moderation of SES and ethnicity (Model XVI).

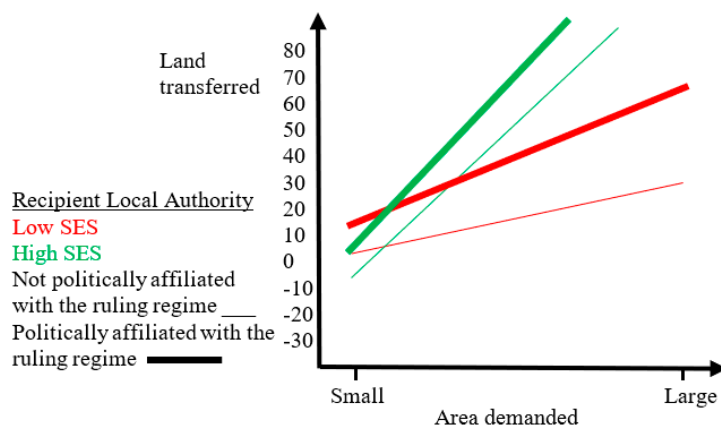

**Figure S17.** Simultaneous moderation of SES and political affiliation (Model XVII).

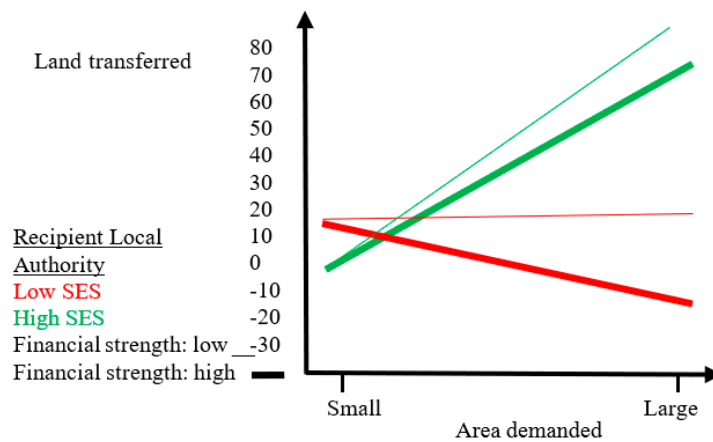

**Figure S18.** Simultaneous moderation of SES and financial strength (Model XVIII).

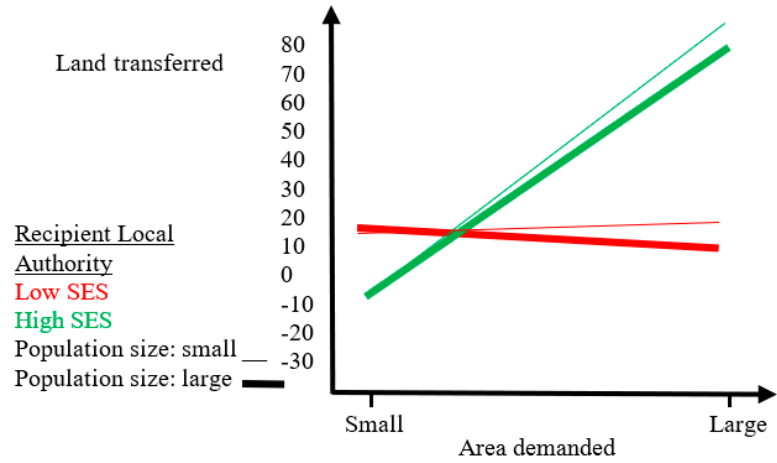

**Figure S19.** Simultaneous moderation of SES and population size (Model XIX).

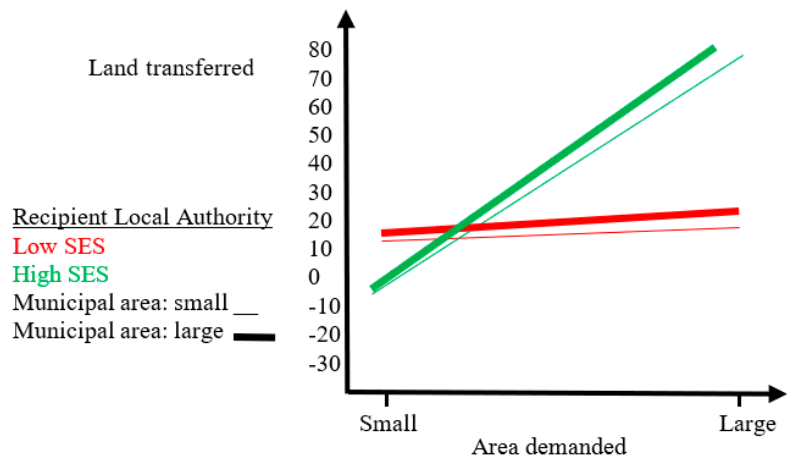

**Figure S20.** Simultaneous moderation of SES and municipal area (Model XX).

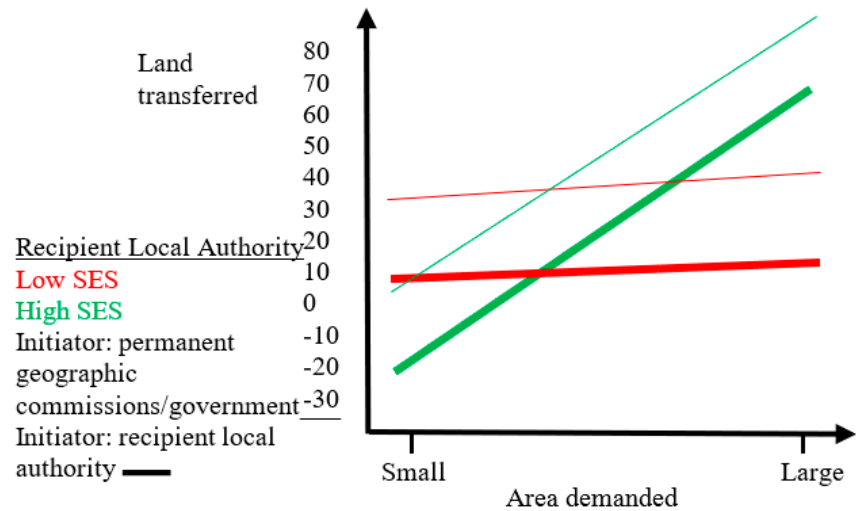

**Figure S21.** Simultaneous moderation of SES and the initiator of process (Model XXI).

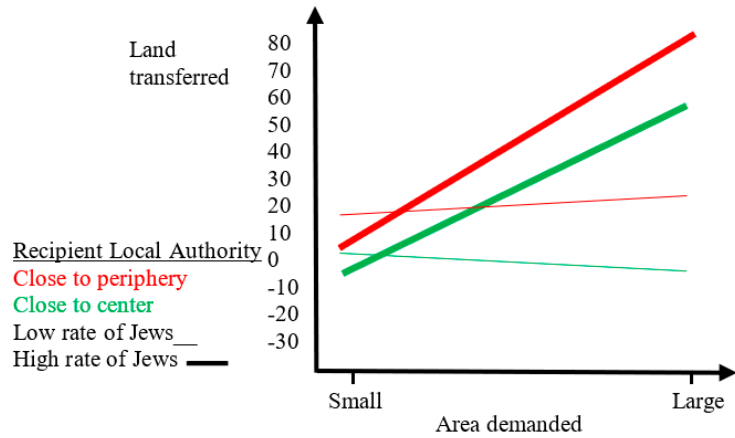

**Figure S22.** Simultaneous moderation of geographic status and ethnicity (Model XXII).

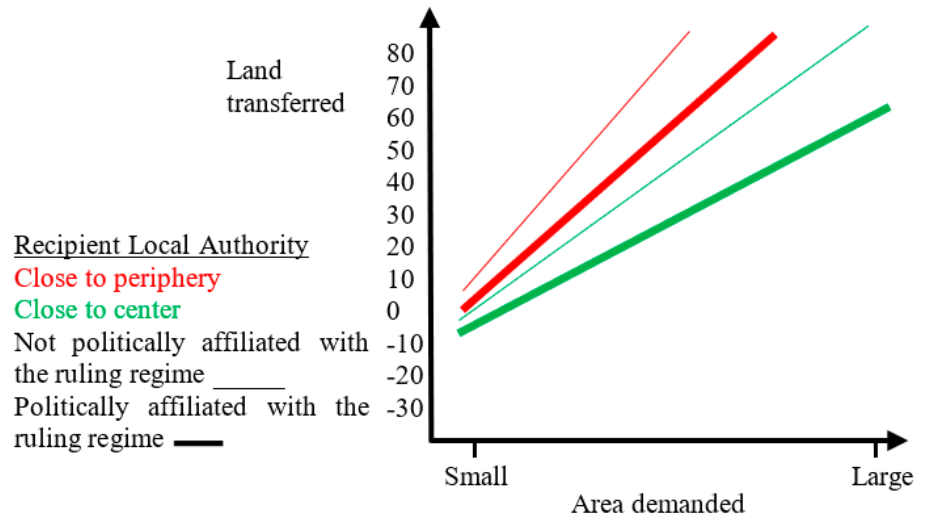

**Figure S23.** Simultaneous moderation of geographic status and political affiliation (Model XXIII).

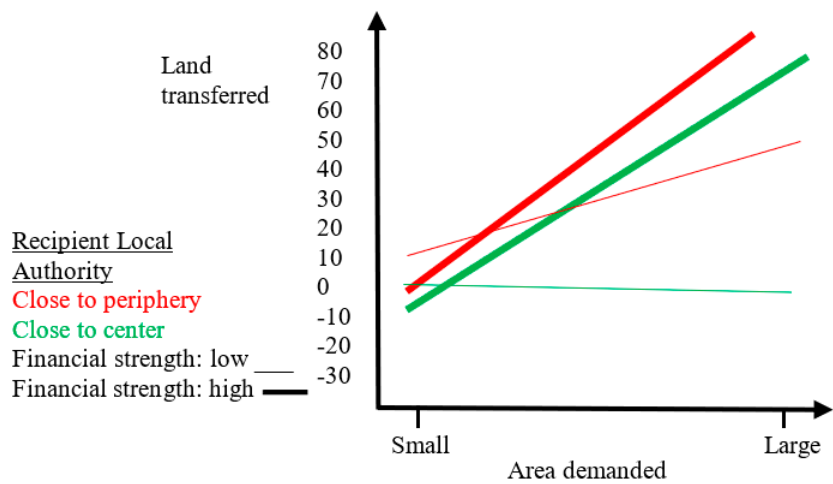

**Figure S24.** Simultaneous moderation of geographic status and financial strength (Model XXIV).

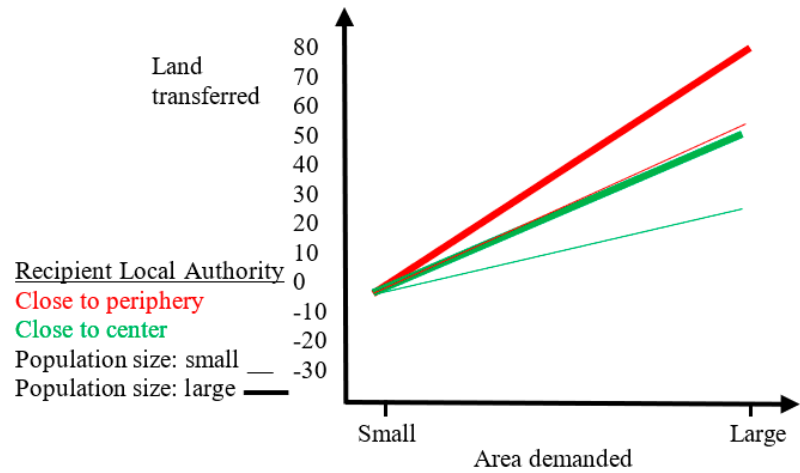

**Figure S25.** Simultaneous moderation of geographic status and population size (Model XXV).

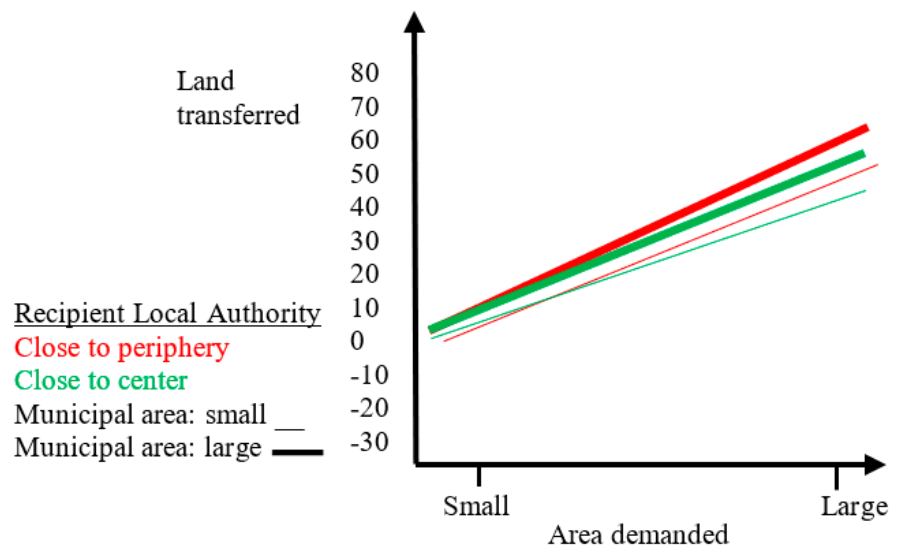

**Figure S26.** Simultaneous moderation of geographic status and municipal area (Model XXVI).

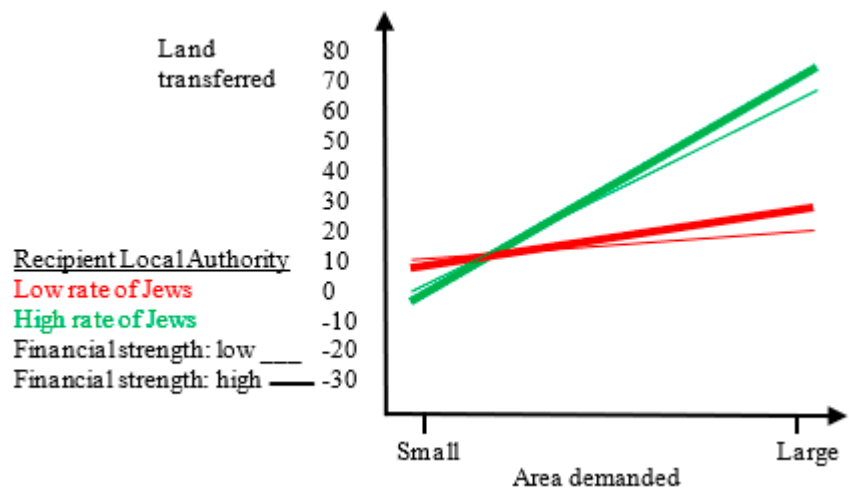

**Figure S27.** Simultaneous moderation of national majority (Jews) and financial strength (Model XXVII).



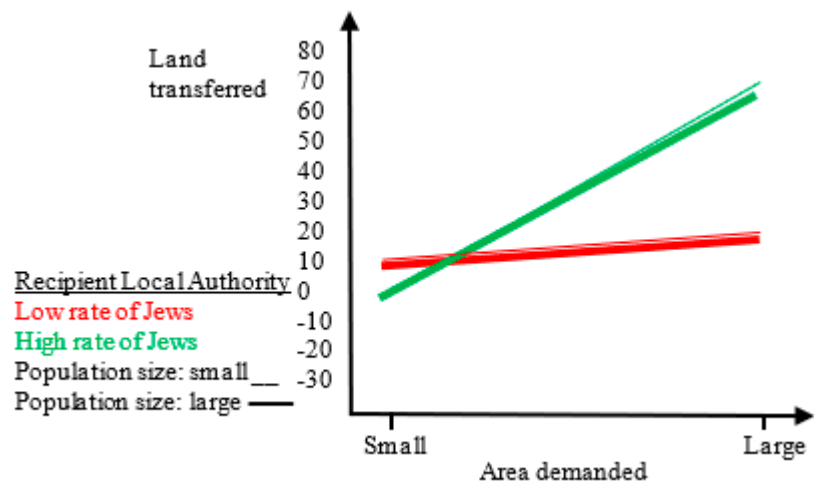

**Figure S28.** Simultaneous moderation of national majority (Jews) and population size (Model XXVIII).

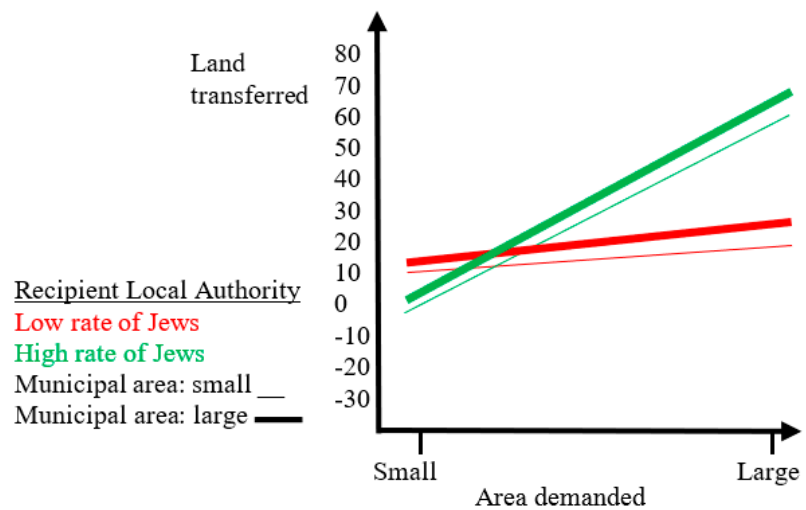

**Figure S29.** Simultaneous moderation of national majority (Jews) and municipal area (Model XXIX).

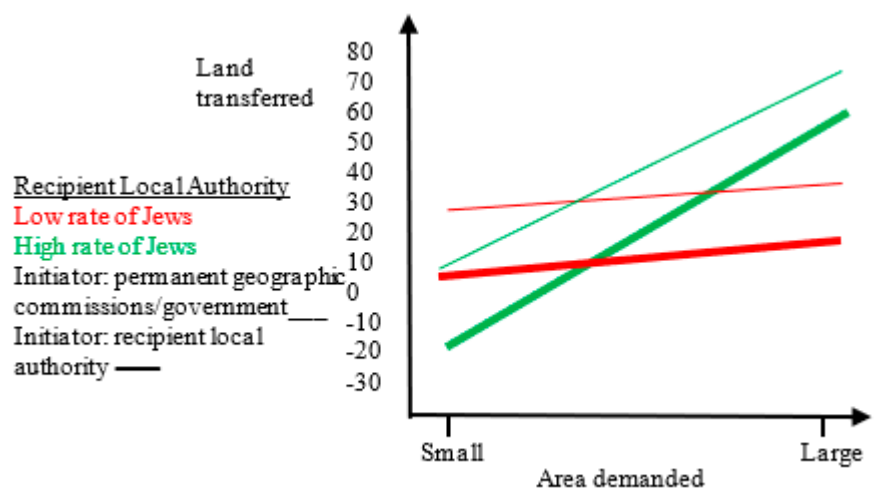

**Figure S30.** Simultaneous moderation of national majority (Jews) and the initiator of process (Model XXX).

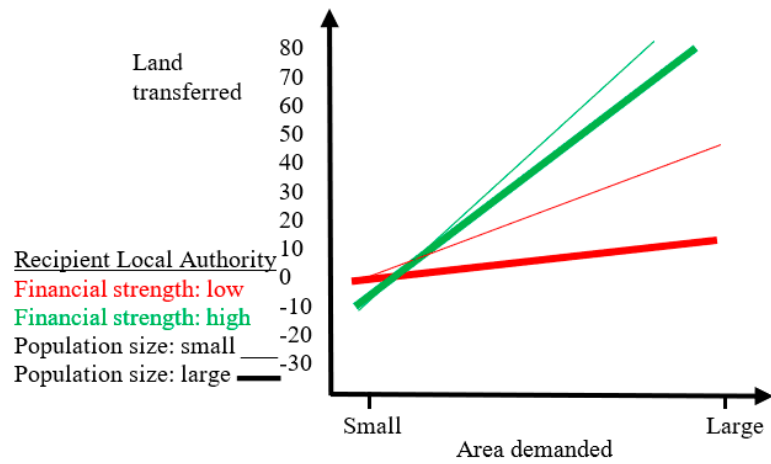

**Figure S31.** Simultaneous moderation of financial strength and population size (Model XXXI).

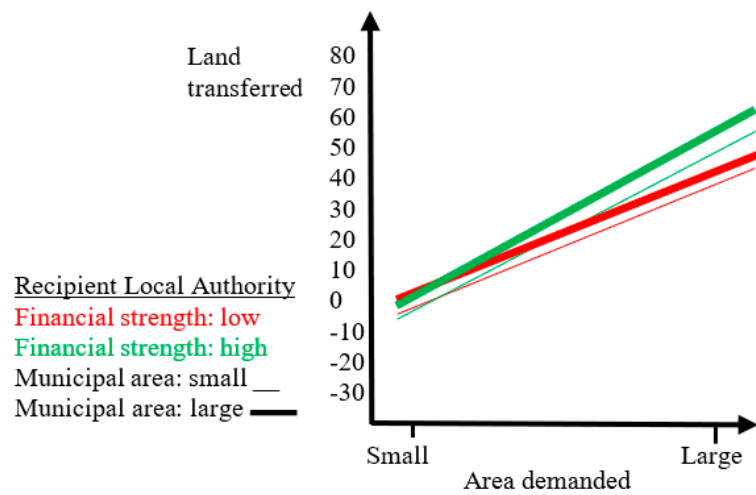

**Figure S32.** Simultaneous moderation of financial strength and municipal area (Model XXXII).

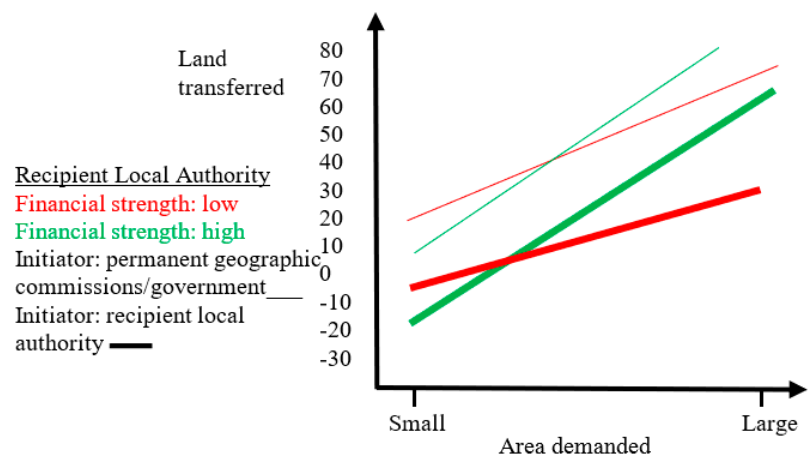

**Figure S33.** Simultaneous moderation of financial strength and the initiator of process (Model XXXIII).

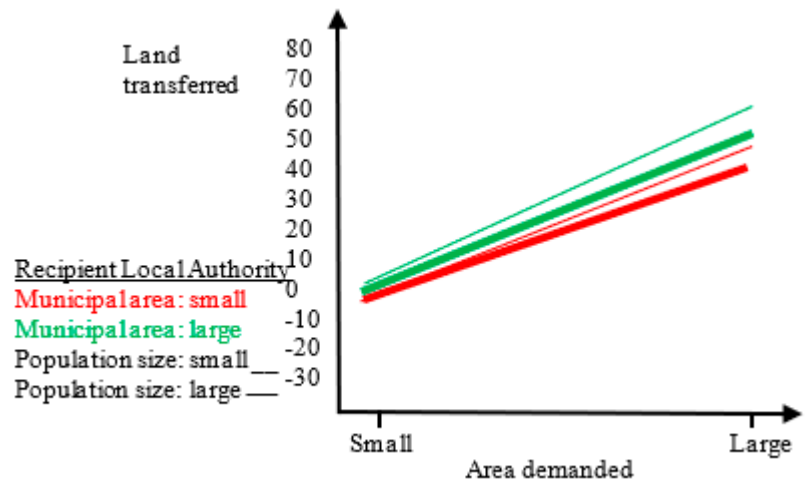

**Figure S34.** Simultaneous moderation of municipal area and population size (Model XXXIV).

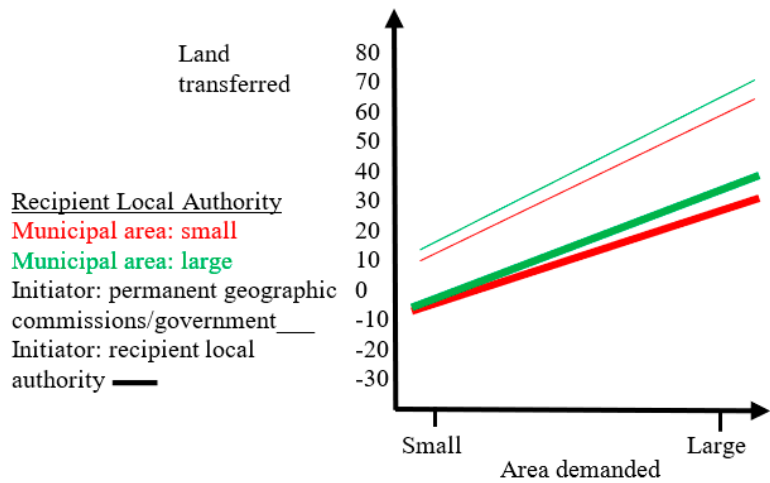

**Figure S35.** Simultaneous moderation of municipal area and the initiator of process (Model XXXV).

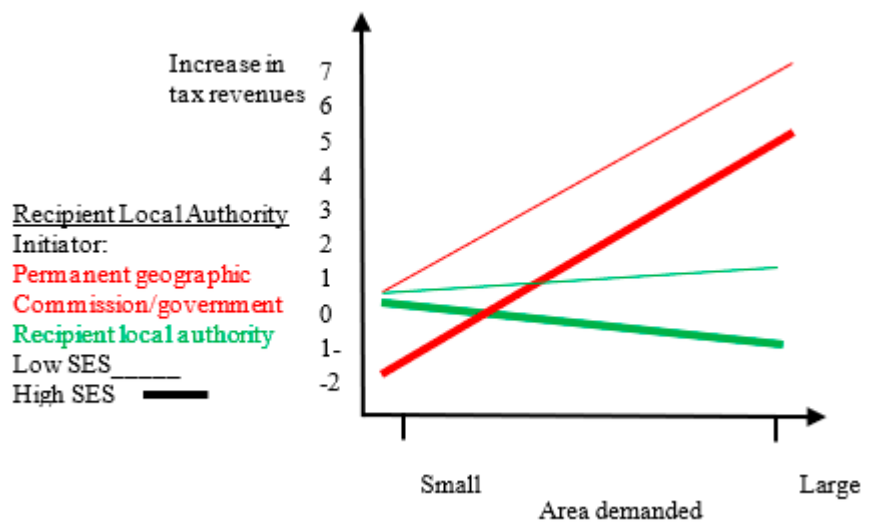

**Figure S36.** Simultaneous moderation of the initiator of process and SES (Model XXXVI).

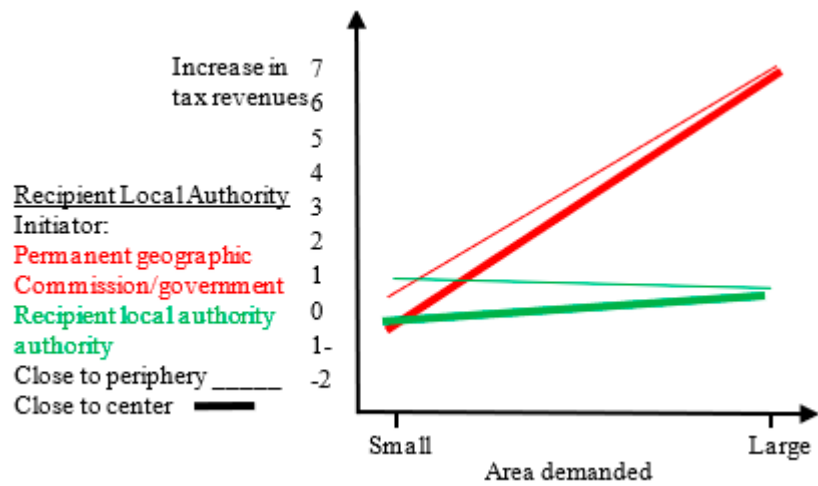

**Figure S37.** Simultaneous moderation of the initiator of process and geographic status (Model XXXVII).

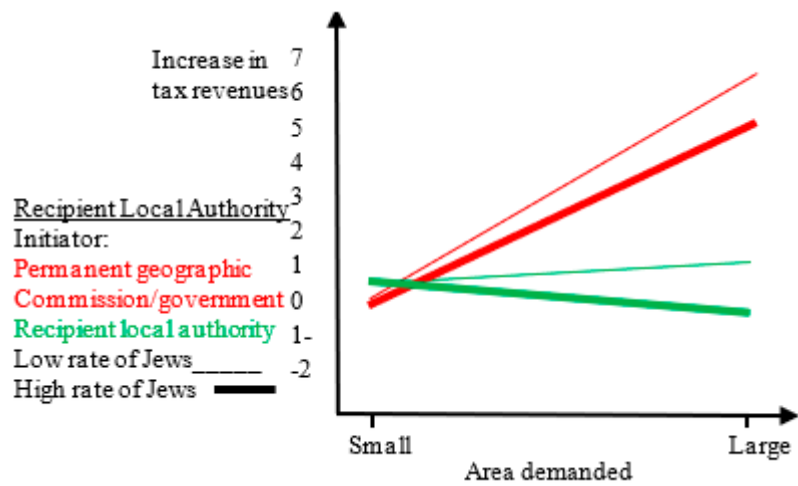

**Figure S38.** Simultaneous moderation of the initiator of process and ethnicity (Model XXXVIII).

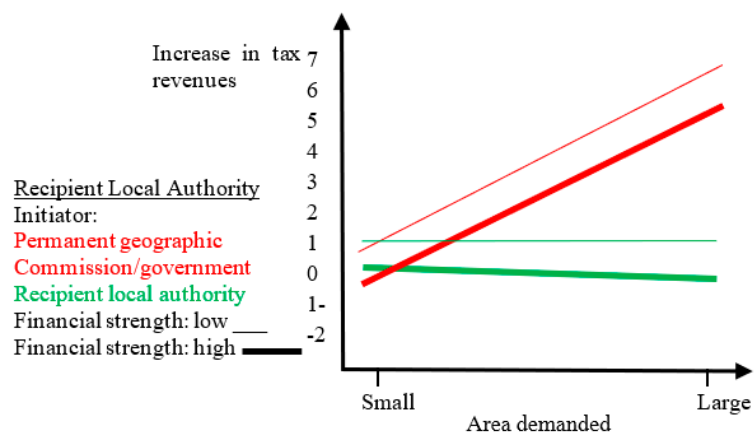

**Figure S39.** Simultaneous moderation of the initiator of process and financial strength (Model XXXIX).

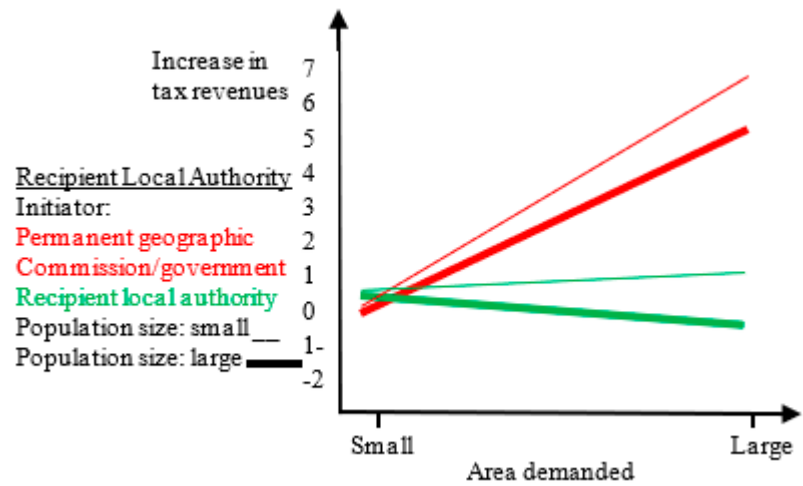

**Figure S40.** Simultaneous moderation of the initiator of process and population size (Model XXXX).

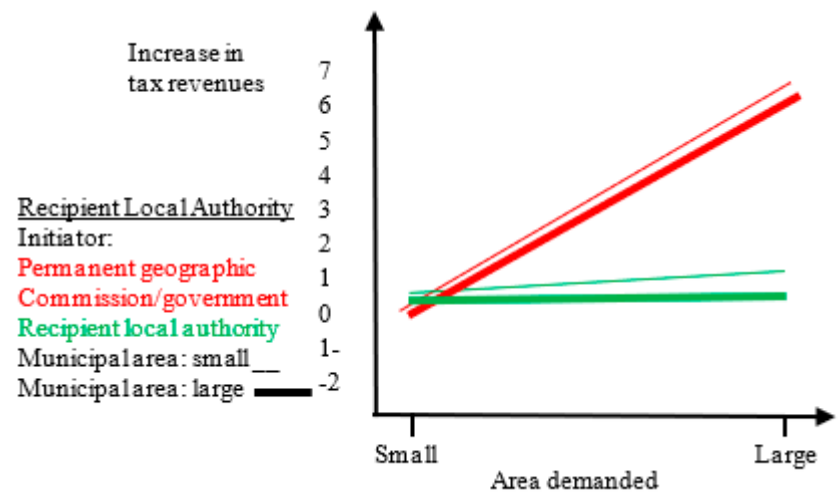

**Figure S41.** Simultaneous moderation of the initiator of process and municipal area (Model XXXXI).

| Regulatory Mechanisms                           |                                    | Permanent geographic commissions - PGC2016-2022 |                               |                                  |                             |                                |                     |                              |                              |                  |                                    |
|-------------------------------------------------|------------------------------------|-------------------------------------------------|-------------------------------|----------------------------------|-----------------------------|--------------------------------|---------------------|------------------------------|------------------------------|------------------|------------------------------------|
|                                                 |                                    | Boundary commissions - BC2003-2016              |                               |                                  |                             |                                |                     |                              |                              |                  |                                    |
| Factors                                         |                                    | 1.<br>Timing of<br>decision                     | 2.<br>Socioeconomic<br>status | 3.<br>Closeness to the<br>center | 4.<br>Ethnicity<br>(Jewish) | 5.<br>Political<br>affiliation | 6.<br>Area demanded | 7.<br>Financial<br>soundness | 8.<br>Population size        | 9.<br>Area of LA | 10.<br>Initiator<br>(recipient LA) |
| Permanent geographic commissions - PGC2016-2022 | Boundary commissions - BC2003-2016 | 1. Decision timing                              | BC                            |                                  |                             |                                |                     |                              |                              |                  |                                    |
|                                                 |                                    | 2. Socioeconomic status                         | BC↑ (i)                       | PGC                              |                             |                                |                     |                              |                              |                  |                                    |
|                                                 |                                    | 3. Closeness to the center                      | BC (ii)                       | BC (iv)<br>PGC (xv)              |                             |                                |                     |                              |                              |                  |                                    |
|                                                 |                                    | 4. Ethnicity (Jewish)                           |                               | BC (v)<br>PGC (xvi)              | BC (vii)<br>PGC (xxii)      | PGC<br>PGC↑                    |                     |                              |                              |                  |                                    |
|                                                 |                                    | 5. Political affiliation                        | BC (iii)                      | BC (vi)<br>PGC (xvii)            | BC (viii)<br>PGC↑ (xxiii)   | BC (ix)                        | BC↑                 |                              |                              |                  |                                    |
|                                                 |                                    | 6. Area demanded                                |                               | PGC (x)                          |                             | PGC (xi)                       |                     | PGC (xii)                    |                              |                  |                                    |
|                                                 |                                    | 7. Financial soundness                          |                               | PGC (xviii)                      | PGC (xxiv)                  | PGC (xxvii)                    |                     | PGC (xii)                    | PGC↑                         |                  |                                    |
|                                                 |                                    | 8. Population size                              |                               | PGC (xix)                        | PGC (xxv)                   | PGC (xxviii)                   |                     |                              | PGC (xxxi)                   |                  |                                    |
|                                                 |                                    | 9. Area of LA                                   |                               | PGC (xx)                         | PGC (xxiv)                  | PGC (xxix)                     |                     | PGC (xiv)                    | PGC (xxxii)                  | PGC (xxxiv)      | PGC                                |
|                                                 |                                    | 10. Initiator (recipient LA)                    |                               | PGC (xxi)<br>PGC↑ (xxxi)         | PGC↑ (xxxvii)               | PGC (xxx)<br>PGC↑ (xxxviii)    |                     | PGC↑                         | PGC (xxxiii)<br>PGC↑ (xxxix) | PGC↑ (xxxix)     | PGC (xxxv)<br>PGC↑ (xxxix)         |

Notes:  
Kinds of impact

**Potential Direct Relationship** between factor and land transferred

**Potential Indirect Effect** of a factor on the relationship between timing/area demanded and land transferred

**Potential Simultaneous Indirect Effect** of 2 factors on the relationship between timing/area demanded and land transferred

Direction of impact

BC↑  
Significant improvement in reducing spatial inequality – land transferred in bc2003-2016

BC  
Significant preservation of spatial inequality – land transferred in BC2003-2016

PGC↑  
Significant improvement in reducing spatial inequality – land transferred in PGC2016-2022

PGC  
Significant Preservation of spatial inequality – land transferred in PGC2016-2022

PGC↑  
Significant improvement in reducing spatial inequality – tax revenues increased in PGC2016-2022

PGC  
Significant Preservation of spatial inequality – tax revenues not increased in PGC2016-2022
